# Supplementary material for: Predictors of Preeclampsia in the First Trimester in Normotensive and Chronic Hypertensive Pregnant Women
Source: MDPI journal article supplement (doi:10.3390/jcm12020579), 2023-01-11
Supplement: s1 [file s1]

# Supplementary material:

## Tables

**Table S1:** Office pulse pressure values in the first trimester in normotensive and chronic hypertensive pregnant women.

|                  | Normotensive          |             |            | cHT                 |               |          |
|------------------|-----------------------|-------------|------------|---------------------|---------------|----------|
|                  | Unaffected<br>(N=116) | PE<br>(N=8) | <i>p</i> * | Unaffected<br>(N=9) | sPE<br>(N=11) | <i>p</i> |
| Office PP (mmHg) | 42.7 ± 7.4            | 44.7 ± 4.9  | 0.467      | 48.7 ± 10.2         | 44.4 ± 7.2    | 0.279    |

PP: Pulse pressure, cHT: chronic hypertensive, PE: preeclampsia, sPE: superimposed preeclampsia. \* After adjusting for BMI, history of PE in previous pregnancies and Caucasian race.

**Table S2.** Ambulatory pulse pressure values in the first trimester in normotensive and chronic hypertensive pregnant women.

|                     | Normotensive          |             |            | cHT                 |               |          |
|---------------------|-----------------------|-------------|------------|---------------------|---------------|----------|
|                     | Unaffected<br>(N=116) | PE<br>(N=8) | <i>p</i> * | Unaffected<br>(N=9) | sPE<br>(N=11) | <i>p</i> |
| Daytime PP (mmHg)   | 42.4 ± 5.7            | 44.8 ± 4.2  | 0.231      | 51.1 ± 8.1          | 46.9 ± 8.6    | 0.280    |
| Nighttime PP (mmHg) | 41.9 ± 6.3            | 44.5 ± 5.1  | 0.268      | 48.1 ± 9.6          | 48.1 ± 11.7   | 0.989    |
| 24-hour PP (mmHg)   | 42.2 ± 5.6            | 44.7 ± 4.4  | 0.222      | 50.0 ± 8.6          | 47.2 ± 9.2    | 0.506    |

PP: Pulse pressure, cHT: chronic hypertensive, PE: preeclampsia, sPE: superimposed preeclampsia. \* After adjusting for BMI, history of PE in previous pregnancies and Caucasian race.

## Figures:

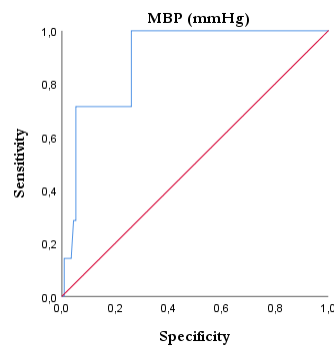

**Figure S1.** ROC curve for the prediction of PE in normotensive pregnant women according to office MBP.

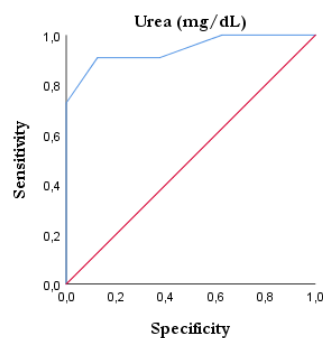

**Figure S2.** ROC curve for the prediction of sPE HTN in chronic hypertensive pregnant women according to plasma urea.
